# Supplementary material for: The Role of Dyslipidemia in Periodontitis
Source: MDPI journal article supplement (doi:10.3390/nu15020300), 2023-01-06
Supplement: s1 [file s1]

# The Role of Dyslipidemia in Periodontitis

Fernando Valentim Bitencourt <sup>1,2,\*</sup>, Gustavo G. Nascimento <sup>1,3,4</sup>, Susilena Arouche Costa <sup>1,5</sup>,  
Silvana Regina Perez Orrico <sup>6,7</sup>, Cecilia Claudia Costa Ribeiro <sup>5</sup> and Fábio Renato Manzolli Leite <sup>1,3,4</sup>

**Table S1.** Sensitivity analysis accounting for missing data. Standardized coefficient, standard error, and p-values of the total and direct effect between dyslipidemia and periodontitis (n = 9844), NHANES III<sup>9</sup> (1988–1994).

| Variables    | Effect                                      | Periodontitis |              |                  |
|--------------|---------------------------------------------|---------------|--------------|------------------|
|              |                                             | $\beta$       | SE           | P-value          |
| Dyslipidemia | Direct                                      | <b>0.037</b>  | <b>0.012</b> | <b>0.001</b>     |
|              | Total                                       | <b>0.022</b>  | <b>0.010</b> | <b>0.021</b>     |
| HbA1c        | Direct                                      | 0.013         | 0.011        | 0.233            |
|              | Indirect                                    |               |              |                  |
|              | Glycohemoglobin-Dyslipidemia-Perio          | <b>0.009</b>  | <b>0.004</b> | <b>0.033</b>     |
|              | Total                                       | <b>0.105</b>  | <b>0.024</b> | <b>&lt;0.001</b> |
| Obesity      | Direct                                      | <b>0.056</b>  | <b>0.029</b> | <b>0.054</b>     |
|              | Indirect                                    | <b>0.036</b>  | <b>0.012</b> | <b>0.002</b>     |
|              | Obesity- Dyslipidemia-Perio                 |               |              |                  |
|              | Obesity- Glycohemoglobin-Dyslipidemia-Perio | <b>0.005</b>  | <b>0.002</b> | <b>0.035</b>     |

Significant p-values are exposed in bold.  $\beta$ - Standard coefficient; SE- Standard Error.

**Table S2.** Sensitivity analysis considering the Health Eating Index (HEI). Standardized coefficient, standard error, and p-values of the total and direct effect between dyslipidemia and periodontitis (n = 9844), NHANES III (1988–1994).

| Variables    | Effect                                      | Periodontitis |              |                  |
|--------------|---------------------------------------------|---------------|--------------|------------------|
|              |                                             | $\beta$       | SE           | P-value          |
| Dyslipidemia | Direct                                      | <b>0.103</b>  | <b>0.026</b> | <b>&lt;0.001</b> |
|              | Total                                       | 0.031         | 0.019        | 0.110            |
| HbA1c        | Direct                                      | 0.006         | 0.023        | 0.794            |
|              | Indirect                                    |               |              |                  |
|              | Glycohemoglobin-Dyslipidemia-Perio          | <b>0.024</b>  | <b>0.011</b> | <b>0.026</b>     |
|              | Total                                       | <b>0.082</b>  | <b>0.021</b> | <b>&lt;0.001</b> |
| Obesity      | Direct                                      | 0.032         | 0.026        | 0.221            |
|              | Indirect                                    | <b>0.042</b>  | <b>0.011</b> | <b>&lt;0.001</b> |
|              | Obesity- Dyslipidemia-Perio                 |               |              |                  |
|              | Obesity- Glycohemoglobin-Dyslipidemia-Perio | <b>0.006</b>  | <b>0.003</b> | <b>0.033</b>     |

Significant p-values are exposed in bold.  $\beta$ - Standard coefficient; SE- Standard Error.
